# Supplementary material for: An Unprecedented alteration in mode of action of IsCT resulting its translocation into bacterial cytoplasm and inhibition of macromolecular syntheses
Source: PubMed Central journal article supplement (PMC4360471; doi:10.1038/srep09127), 2015-03-16
Supplement: srep09127-s1.pdf [file srep09127-s1.pdf]

## Supplementary information

### **An Unprecedented alteration in mode of action of IsCT resulting its translocation into bacterial cytoplasm and inhibition of macromolecular syntheses**

Jitendra K. Tripathi<sup>1</sup>, Manoj Kathuria<sup>2</sup>, Amit Kumar<sup>1</sup>, Kalyan Mitra<sup>2</sup> and Jimut K. Ghosh<sup>1</sup>#

<sup>1</sup>Molecular and Structural Biology Division

<sup>2</sup>Electron Microscopy Unit

CSIR-Central Drug Research Institute,

Sector 10, Jankipuram Extension, Sitapur Road

Lucknow–226 031, India

#To whom correspondence should be addressed: Jimut K. Ghosh, Molecular and Structural Biology Division, CSIR-Central Drug Research Institute, Sector 10, Jankipuram Extension, Sitapur Road, Lucknow–226 031, India, Tel: 091-522-2771940 (Ext.-4451); Fax: 091-522-2771941, E-mail: [jighosh@yahoo.com](mailto:jighosh@yahoo.com); [jk\\_ghosh@cdri.res.in](mailto:jk_ghosh@cdri.res.in).

## Supplemental Tables

**Supplementary Table S1:** Physicochemical parameters of IsCT and its analogs

| Peptides     | $\mu$ -rel H<br>(Mean relative<br>H moment) | $\mu$ H<br>(Mean H<br>moment) | $\langle H \rangle$<br>(Mean<br>Hydrophobicity) | Aliphatic<br>Index | GRAVY |
|--------------|---------------------------------------------|-------------------------------|-------------------------------------------------|--------------------|-------|
| IsCT         | 0.81                                        | 5.13                          | 2.15                                            | 150.00             | 0.777 |
| E7K-IsCT     | 0.83                                        | 5.25                          | 2.03                                            | 150.00             | 0.746 |
| I9K-IsCT     | 0.59                                        | 3.71                          | 0.72                                            | 120.00             | 0.131 |
| E7K,I9K-IsCT | 0.61                                        | 3.83                          | 0.59                                            | 120.00             | 0.100 |

**Supplementary Table S2: Secondary Structure Estimation (SSE)\* of IsCT and its analogs**

| Peptide                                                         | % Helix | % Beta | % Turn | % Random |
|-----------------------------------------------------------------|---------|--------|--------|----------|
| <b>A. SSE of peptides in PBS (pH 7.4)</b>                       |         |        |        |          |
| IsCT                                                            | 0       | 39.0   | 0.0    | 61.0     |
| E7K- IsCT                                                       | 0       | 32.7   | 7.3    | 60.0     |
| I9K- IsCT                                                       | 0       | 25.5   | 3.0    | 71.5     |
| E7K,I9K- IsCT                                                   | 0       | 27.0   | 5.7    | 67.3     |
| <b>B. SSE of peptides in presence of PC/Chol lipid vesicles</b> |         |        |        |          |
| IsCT                                                            | 28.3    | 20.8   | 18.0   | 32.9     |
| E7K- IsCT                                                       | 15.3    | 30.1   | 13.9   | 40.7     |
| I9K- IsCT                                                       | 0.0     | 24.8   | 5.3    | 69.9     |
| E7K,I9K- IsCT                                                   | 0.0     | 25.5   | 10.7   | 64.0     |
| <b>C. SSE of peptides in presence of PC/PG lipid vesicles</b>   |         |        |        |          |
| IsCT                                                            | 29.2    | 21.2   | 17.8   | 31.0     |
| E7K- IsCT                                                       | 25.9    | 20.1   | 19.7   | 34.3     |
| I9K- IsCT                                                       | 0.0     | 32.2   | 4.5    | 63.2     |
| E7K,I9K- IsCT                                                   | 0.0     | 24.7   | 8.7    | 66.6     |

\*Data analyzed by-JASCO CD, Model Name-J-815, SSE (Secondary Structure Estimation) software.

**Supplemental Figure:**

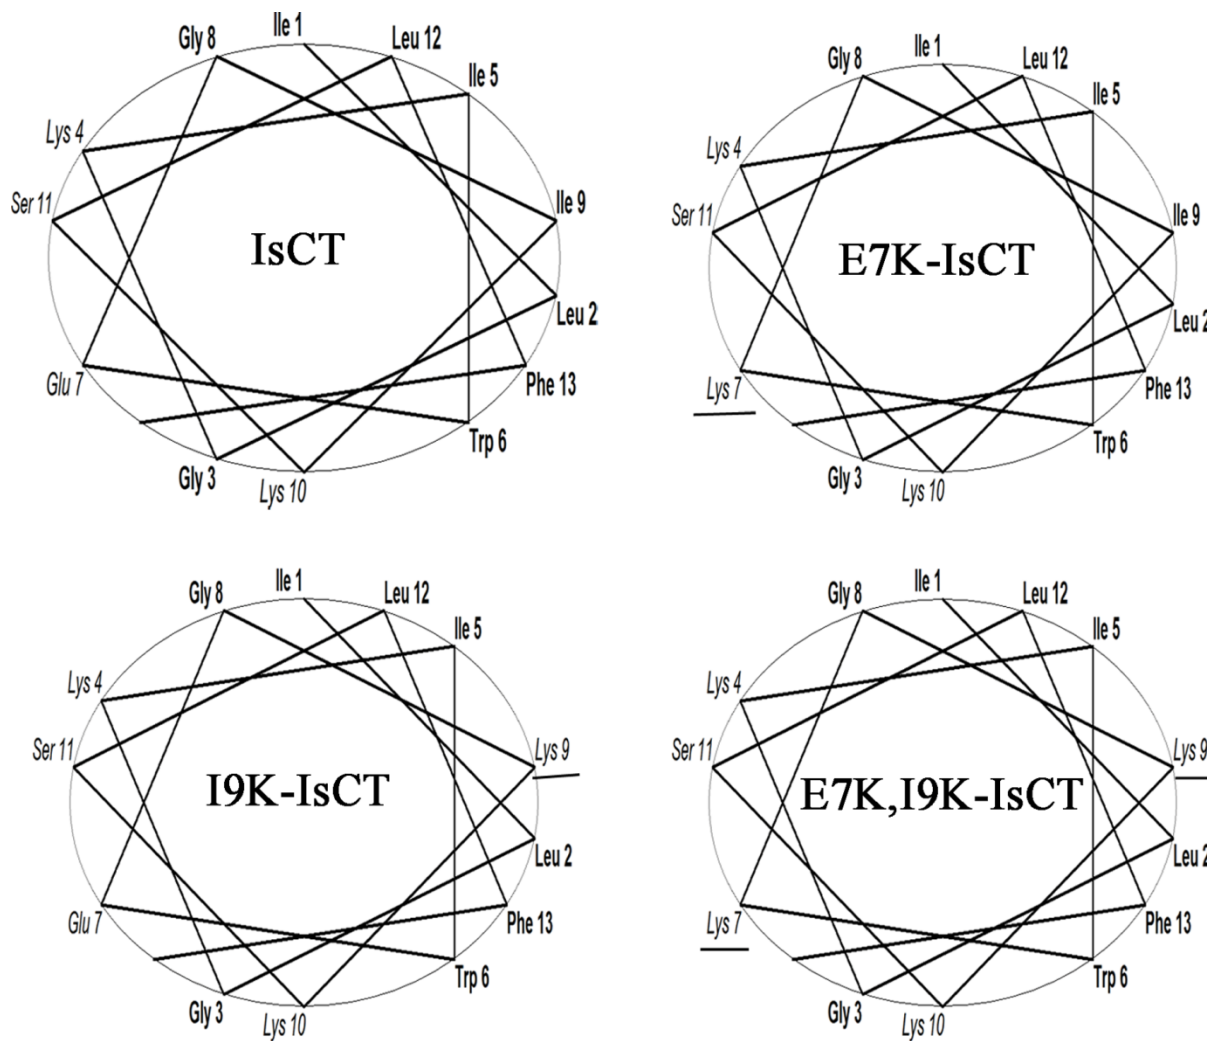

**Supplementary Figure S1:** Helical wheel projections of IsCT and its analogues. Substituted amino acids are underlined

Figure S2

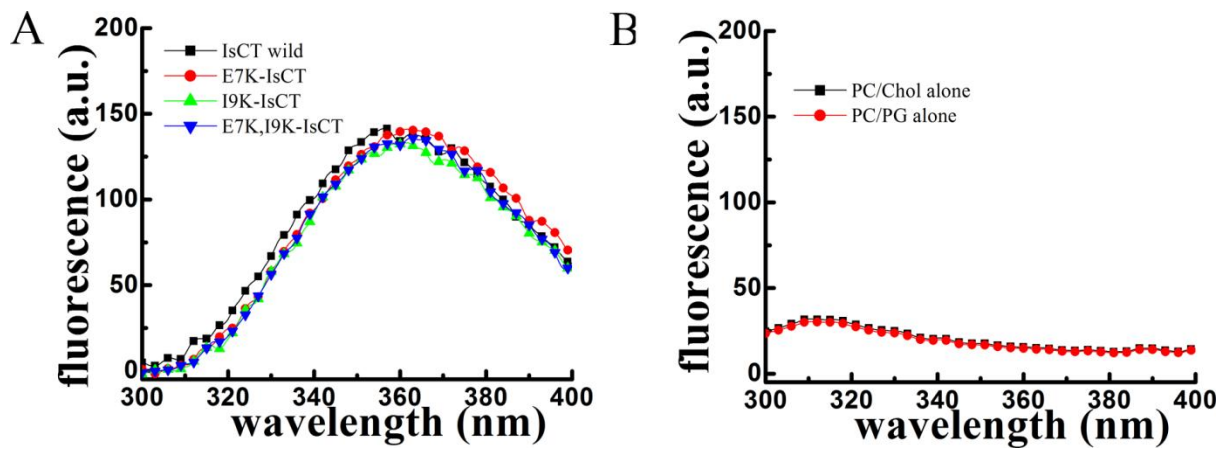

**Supplementary Figure S2:** Intrinsic Tryptophan fluorescence of peptides alone (A) and of PC/Chol and PC/PG alone (B), in PBS. Concentration of the each peptides used was  $\sim 2.0 \mu\text{M}$  and lipid concentration was  $\sim 450 \mu\text{M}$ .

Figure S3

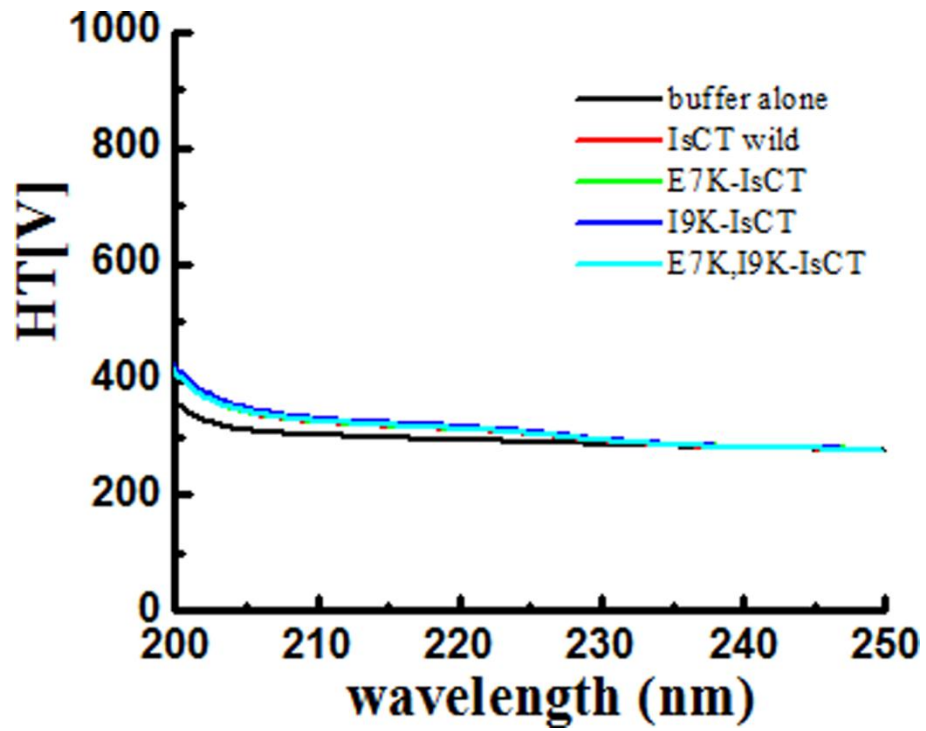

**Supplementary Figure S3:** Change in HT voltage of the buffer as well different peptides in PBS, pH 7.4. Concentration of the each peptides used was ~43  $\mu$ M.

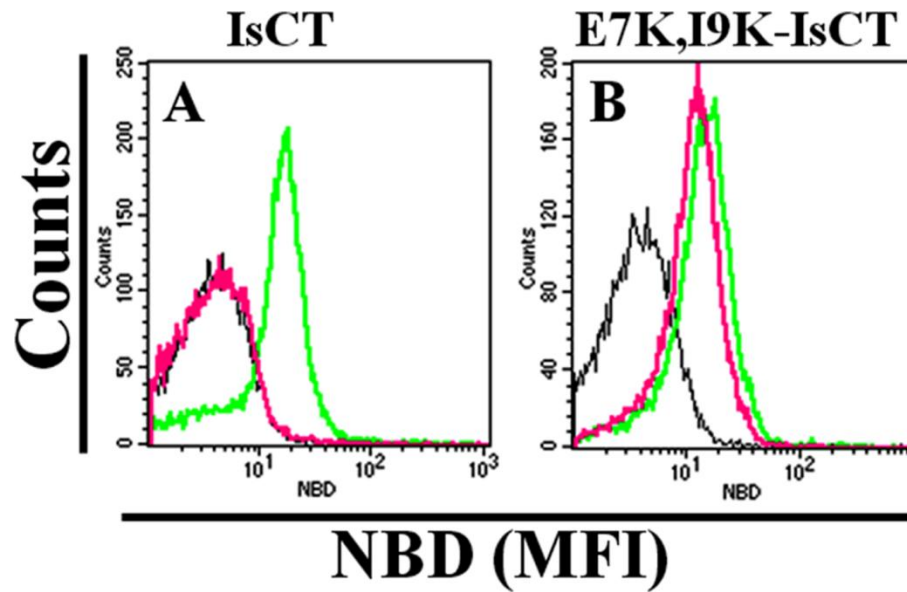

**Supplementary Figure S4:** Quenching of NBD fluorescence of *E. coli* ATCC 25922 bacteria bound to NBD-labeled IsCT or E7K,I9K-IsCT as marked in the Fig. by trypan blue. *E. coli* ( $1 \times 10^6$  CFU/ml) were incubated with or without NBD-labeled peptides (either NBD-labeled IsCT or E7K,I9K-IsCT at  $2.0 \mu\text{M}$  peptide concentration), washed, and analyzed by flow cytometry; Symbols: with NBD-labeled peptide, green histograms and without peptide, black histograms. *E. coli* bacteria treated with each of the NBD-labeled peptides were separately incubated with Trypan Blue ( $1 \text{mg/ml}$ ) for 10 min at  $37^\circ\text{C}$  and further analyzed by flow cytometry (pink histograms).
